# Supplementary material for: Dedifferentiation‐derived neural stem cells exhibit perturbed temporal progression
Source: PubMed Central journal article supplement (PMC10240205; doi:10.15252/embr.202255837), 2023-04-11
Supplement: EMBR-24-e55837-s002.pdf [file EMBR-24-e55837-s002.pdf]

## Appendix File Table of Contents

|                                                                                                                                                                                              |          |
|----------------------------------------------------------------------------------------------------------------------------------------------------------------------------------------------|----------|
| <b>Appendix figure S1 Dpn overexpression induces proliferative NBs and Dpn is epistatic to Nerfin-1 RNAi.....</b>                                                                            | <b>2</b> |
| Figure.....                                                                                                                                                                                  | 2        |
| Figure legend.....                                                                                                                                                                           | 3        |
| <b>Appendix figure S2 <i>N<sup>ACT</sup></i> ectopic NBs do not terminate at 24 hr APF and Cdk4+CycD promote temporal progression in dedifferentiated NBs induced via Dpn overexpression</b> | <b>4</b> |
| Figure.....                                                                                                                                                                                  | 4        |
| Figure legend.....                                                                                                                                                                           | 5        |

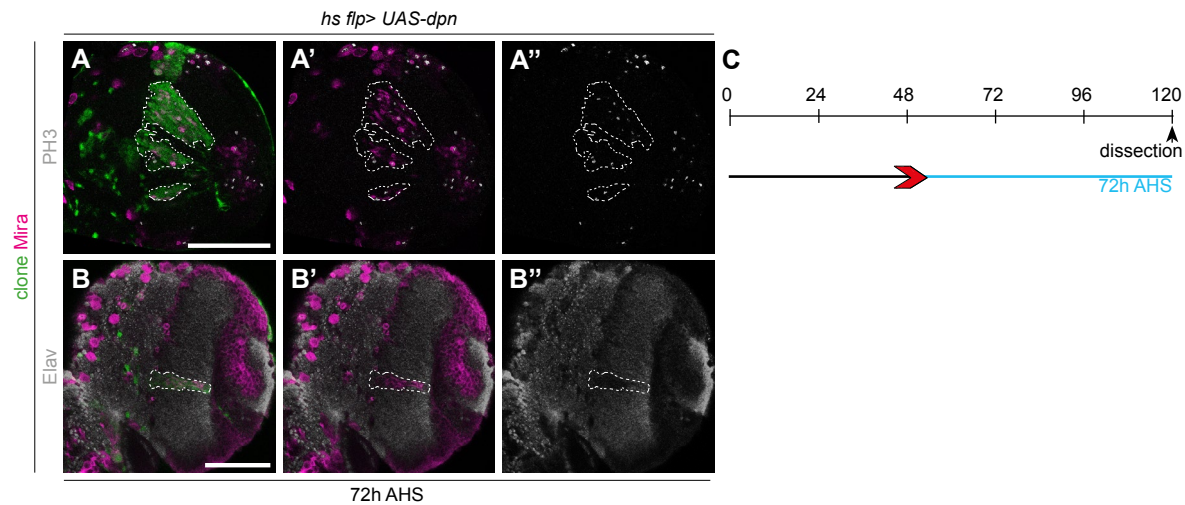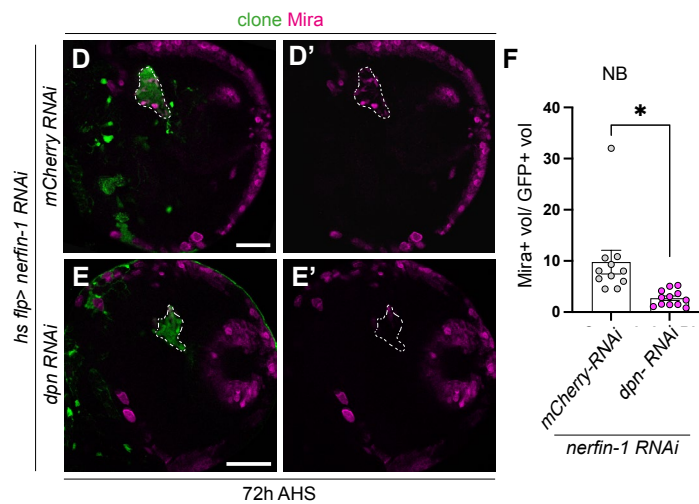

## Appendix figure S1 Dpn overexpression induces proliferative NBs and Dpn is epistatic to Nerfin-1 RNAi

(A-B'') Representative images of the deep medulla neuronal layer in the larval optic lobe, in which *UAS-dpn* and control clones are generated via *hs flp*. At 72h after clone induction, Mira<sup>+</sup> NBs (magenta) express M phase marker PH3 (grey) and do not express neuronal marker Elav (grey).

(C) Heat shock regime for (A-B' and E-F''). Clones were induced by heat shock (red) at 48 hr AEL and dissected 72 hr (blue) after heat shock.

(D-E') Representative images of the deep medulla neuronal layer in the larval optic lobe, in which *UAS-dpn*, *nerfin-1 RNAi*; *mCherry RNAi*, *nerfin-1 RNAi*; *dpn RNAi* are driven in clones by *hs flp* (marked by GFP and outlined) and stained with the stem cell marker, Miranda (Mira, magenta). Less Mira<sup>+</sup> ectopic NBs are induced when driven by *nerfin-1 RNAi*; *dpn RNAi*, compared to *nerfin-1 RNAi* alone, quantified in F.

(F) Quantification of % Mira<sup>+</sup> cells in control *nerfin-1 RNAi*; *mCherry RNAi* and *nerfin-1 RNAi*; *dpn RNAi* clones (calculated as the ratio of Mira<sup>+</sup> cell volume as a percentage of total clone volume). *nerfin-1 RNAi*; *mCherry RNAi* n=11, m=9.774 ±2.325, *nerfin-1 RNAi*; *dpn RNAi* n=12, m=2.722 ±0.441.

Data are represented as mean ± SEM. P-values were obtained performing unpaired t-test, and Welch's correction was applied in case of unequal variances. \*p < 0.05.

Scale bars: 50 μm.

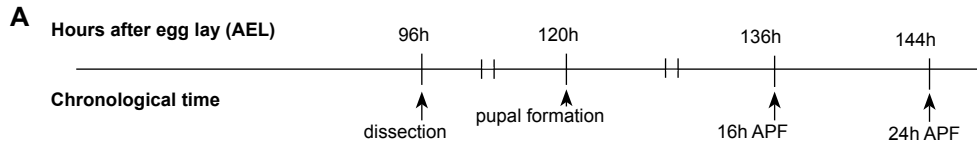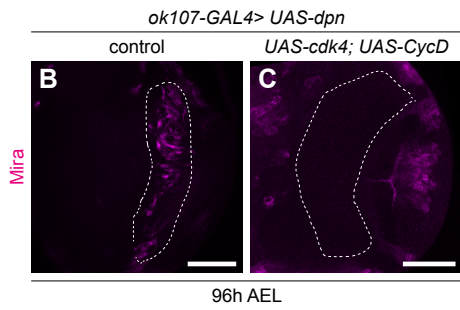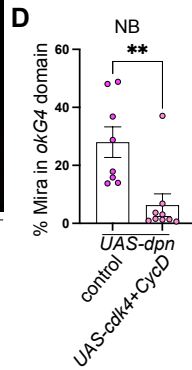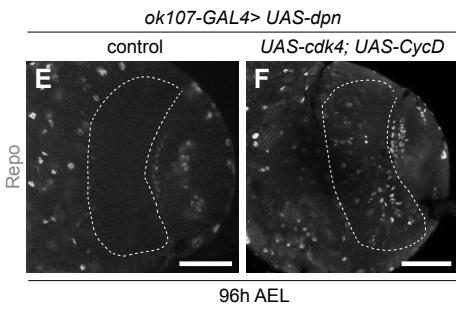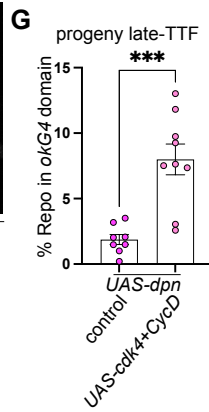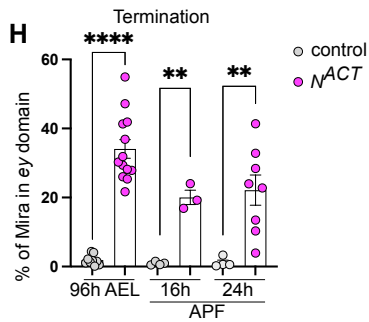

**Appendix figure S2  $N^{ACT}$  ectopic NBs do not terminate at 24 hr APF and Cdk4+CycD promote temporal progression in dedifferentiated NBs induced via Dpn overexpression**

(A) Time line depicting age of ectopic neuroblasts (NBs). Larvae are dissected at 96 hr. Pupal formation occurs at 120 hr AEL; pupae are dissected at 136 hr (16 hr APF) and 144 hr AEL (24 hr APF).

(B-C) Representative images of the deep medulla neuronal layer in the larval optic lobe, where *UAS-cdk4*; *UAS-CycD*; *UAS-dpn* or *UAS-dpn*; *UAS luc* are expressed in the *ok107-GAL4* domain (outlined), and stained with the stem cell marker, Mira (magenta). Quantified in D.

(D) Quantification of % Mira-positive cells within *ok107-GAL4* expression domain in *UAS-dpn* control and *UAS-cdk4*; *UAS-CycD*; *UAS-dpn* (calculated as the ratio of Mira+ cell volume as a percentage of total *ok107-GAL4* domain volume). *UAS-dpn* control n= 8, m= 27.99,  $\pm 5.288$ , *UAS-cdk4*; *UAS-CycD*; *UAS-dpn*, n= 9, m= 6.275,  $\pm 3.906$ .

(E-F) Representative images of the deep medulla neuronal layer in the larval optic lobe, where *UAS-dpn* control or *UAS-cdk4*; *UAS-CycD*; *UAS-dpn* are expressed in the *ok107-GAL4* domain. Glial cells are labelled with Repo (grey) within the *ok107-GAL4* domain (outlined). Quantified in G.

(G) Quantification of % Repo-positive cells within *ok107-GAL4* expression domain in *UAS-dpn* and *UAS-cdk4*; *UAS-CycD*; *UAS-dpn* (calculated as the ratio of Repo+ cell volume as a percentage of total *ok107-GAL4* domain volume). *UAS-dpn* n= 8, m= 1.875,  $\pm 0.3837$ , *UAS-cdk4*; *UAS-CycD*; *UAS-dpn* n= 9, m= 7.997,  $\pm 1.173$ .

(H) Quantification of % Mira+ cells within *ok107-GAL4* expression domain in *UAS-N<sup>ACT</sup>* and control (calculated as the ratio of Mira+ cell volume as a percentage of total *ok107-GAL4* domain volume). 96 hr (Control n= 9, m= 1.874  $\pm 0.4897$ , *UAS-N<sup>ACT</sup>* n= 13, m= 34.06,  $\pm 2.7$ ). 136 hr (Control n= 4, m= 0.8897,  $\pm 0.239$ , *UAS-N<sup>ACT</sup>* n= 3, m= 20.04  $\pm 2.091$ ). 144 hr (Control n= 4, m= 1.174  $\pm 0.7226$ , *UAS-N<sup>ACT</sup>* n= 8 m= 22.14,  $\pm 4.382$ ).

Data are represented as mean  $\pm$  SEM. P-values were obtained performing unpaired t-test, and Welch correction was applied in case of unequal variances. \*\*\*\*p<0.0001, \*\*\*p<0.001, \*\*p<0.005, \*p<0.05. Scale bars: 50  $\mu$ m.
